# Supplementary material for: Serum albumin and white matter hyperintensities
Source: Research Square preprint supplement (doi:10.21203/rs.3.rs-3822513/v1), 2024-01-11
Supplement: Supplementary file 1 [file 28c789f849359a4d7313ff3b.xlsx]

## Sheet: table 1
	Table 1. Demographic Characteristics by Diagnostic Group: mean±standard deviation or frequency count
		Control (n=102)	AUD (n=160)	HIV (n=142)	𝜒2 or F	p-value*
	N (women/men)	48 / 54	44 / 116	44 / 98	11.4	0.0034
	Age (years)	53.3±15.3	50.8±10.7	52.5±9.2	1.7	0.1935
	Self-Defined Race (White/AA/othera)	57 / 20 / 25	71 / 62 / 27	45 / 70 / 27	24.2	<.0001
	Handedness (Right/Left)	90 / 12	137 / 23	119 / 23	4.7	0.3213
	Body Mass Index (BMI)	26.1±4.3	27.3±4.4	26.2±4.2	3.5	0.0332
	Education (years)	16.1±2.4	13.4±2.5	13.3±2.4	49	<.0001
	Socioeconomic Statusb	25.5±12.5	41.9±15.4	41.3±13.9	57.6	<.0001
	Smoker (never/past or current)	93 / 9	48 / 112	62 / 80	97.1	<.0001
	Hypertensivec [yes/no/(missing)]	59 / 18 / (25)	106 / 42 / (12)	88 / 26 / (28)	1.3	0.5314
	Diabeticd (yes/no)	3 / 99	9 / 151	10 / 132	2	0.3761
	Age at first drink (years)	19.8±5.6	16.7±4.5	17.9±6.2	11.1	<.0001
	Lifetime Alcohol Consumption	40.7±68.8	1274.2±992.6	524.5±763.1	148.5	<.0001
	Days since last drink	678.9±2895.8	200.7±541.0	253.6±973.4	1.4	0.2434
	AUDIT scores	1.9±1.6	20.4±11.8	7.1±9.3	187	<.0001
	HIV duration (years)	-	-	17.4±8.4	-	-
	CD4 cell count (100/mm3)	-	-	580.5±296.0	-	-
	CD4 cell count nadir (100/mm3)	-	-	187.8±153.1	-	-
	Viral Load (log copies/mL)	-	-	2.1±1.1	-	-
	AIDS-defining event (yes/no)	-	-	17 / 128	-	-
	ART (yes/no)	-	-	128 / 17	-	-
	Hepatitis C Virus (HCV + / - )	1 / 101	34 / 126	54 / 88	47.5	<.0001
	Treatment for HCVe (yes/no)	0 / 102	9 / 151	9 / 133	6.5	0.0392
	albumin (g/dL)	4.46±0.28	4.44±0.31	4.28±0.41	10.1	<.0001
	albumin<3.5g/dL	0	0	6	11.2	0.0036
	*Comparison's including 4-group (control, AUD=alcohol use disorder, HIV=human immunodeficiency virus) used Welsh's test for unequal variables for continous variables or 𝜒2 for categorical variables. aother= Native American, Asian, Islander; blower score = higher status; cHypertensive=systolic≥140 or diastolic≥190; dself resport of diabetes; AUDIT = Alcohol Use Disorders Identification Test; AIDS-…
