# Supplementary material for: Serum albumin and white matter hyperintensities
Source: Research Square preprint supplement (doi:10.21203/rs.3.rs-3822513/v1), 2024-01-11
Supplement: Supplementary file 2 [file 3223042be1ca4a0433677e6b.xlsx]

## Sheet: table S1
	Table S1. Results of multiple regression models* predicting cognitive perfomance
	executive functioning	F8,340=8.5, p<.0001, R2=17.1; diagnoses (-log10[FDR p-value]=4.2), periventricular WMH (log10[FDR p-value]=3.6)
	attention and working memory	F8.358=7.7, p<.0001, R2=15.0; diagnoses (-log10[FDR p-value]=5.9), periventricular WMH (log10[FDR p-value]=2.1
	visual and verbal learning	F8,349=10.8, p<.0001, R2=20.2; diagnoses (-log10[FDR p-value]=10.9), albumin (-log10[FDR p-value]=2.6)
	visual and verbal memory	F8,349=11.0, p<.0001, R2=20.6; diagnoses (-log10[FDR p-value]=10.4), albumin (-log10[FDR p-value]=2.9)
	*each model considered age, sex, BMI, hypertension, diagnoses, albumin, and periventricular WMH volume
