# Supplementary material for: Serum albumin and white matter hyperintensities
Source: Research Square preprint supplement (doi:10.21203/rs.3.rs-3822513/v1), 2024-01-11
Supplement: Supplementary file 3 [file 4540787c85f1b849bb70952c.xlsx]

## Sheet: table 2
	Table 2. Relations between albumin or HCV with other blood markers
			albumin (g/dL)*		HCV^
			r	p	F	p
	Complete Blood Count
		white blood cell count (thousand/uL)	0.04	0.4547	0.29	0.5912
		red blood cell count (million/uL)	0.28	<.0001	2.82	0.0954
		hemoglobin (g/dL)	0.38	<.0001	0.15	0.7009
		hematocrit (%)	0.32	<.0001	0.0574	0.8111
		mean corpuscular (MC) volume (fL)	0	0.9825	5.692	0.0186
		MC hemoglobin (MCH, pg)	0.07	0.1664	3.66	0.058
		MCH concentration (g/dL)	0.21	<.0001	0.5958	0.4415
		red cell distribution width (%)	-0.24	<.0001	5.115	0.0253
		platelet count (thousand/uL)	0.0167	0.744	16.754	<.0001
		mean platelet volume (fL)	0	0.9666	1.5575	0.2145
	Metabolic Panel
		protein (g/dL)	0.18	0.0002	30.2585	<.0001
		albumin (g/dL)	-	-	29.4655	<.0001
		globulin (g/dL)	-0.39	<.0001	69.5278	<.0001
		bilirubin (mg/dL)	0.06	0.2437	0.0437	0.8347
		alkaline phosphatase (U/L)	-0.09	0.0617	3.633	0.0593
		aspartate transaminase (AST, U/L)	-0.19	0.0002	26.0885	<.0001
		alanine transaminase (ALT, U/L)	-0.1	0.0403	8.24	0.0045
		𝛾-glutamyl transferase (GGT, U/L)	-0.08	0.1031	9.756	0.0021
		prealbumin	0.3582	<.0001	29.042	<.0001
		blood urea nitrogen (BUN)	0	0.913	0.5224	0.4722
		creatinine	0.049	0.5015	0.3388	0.5626
		eGFR	0.065	0.4673	0.588	0.4468
	Nutrition
		vitamin B9 (folate)	0.11	0.0483	0.3006	0.5845
		viamin B12 (cobalamin)	-0.04	0.5158	4.6127	0.034
	Inflammation
		TNFa	0.013	0.862	13.76	0.0006
		IP10	-0.15	0.0503	56.66	<.0001
	*simple regression; ^Welsh's test for unequal variances, HCV positive (n=89) vs. negative (n=315); eGFR=estimated glomerular filtration rate; Bold = signficant at Bonferroni-corrected p-value≤0.005 (for 10 CBC variables); p-value ≤0.004 (for 12 metabolic variables); p-value ≤0.016 (for 3 nutrional variables); p-value ≤0.025 (for 2 inflammatory variables).
